# Supplementary material for: From Hub Proteins to Hub Modules: The Relationship Between Essentiality and Centrality in the Yeast Interactome at Different Scales of Organization
Source: PLOS journal article supplement (doi:10.1371/journal.pcbi.1002910), 2013-02-21
Supplement: S18 (10.1371/journal.pcbi.1002910.s018) [file journal.pcbi.1002910.s018]

| Network          | Num Proteins | Num Interactions | Fraction of Essential Proteins |
|------------------|--------------|------------------|--------------------------------|
| <b>Direct</b>    | 4031         | 15073            | 0.22                           |
| <b>Pull-down</b> | 4449         | 36455            | 0.22                           |
| <b>Full</b>      | 5167         | 50170            | 0.20                           |

**Table S 1. The number of proteins, the number of interactions and the fraction of essential proteins for each of the three physical interaction networks considered.**
