# Supplementary material for: From Hub Proteins to Hub Modules: The Relationship Between Essentiality and Centrality in the Yeast Interactome at Different Scales of Organization
Source: PLOS journal article supplement (doi:10.1371/journal.pcbi.1002910), 2013-02-21
Supplement: S19 (10.1371/journal.pcbi.1002910.s019) [file journal.pcbi.1002910.s019]

| Modules           | Num<br>Annotated<br>Interactions | Num<br>Intramodular<br>Interactions | Num<br>Intermodular<br>Interactions | Intermodular<br>Percentage |
|-------------------|----------------------------------|-------------------------------------|-------------------------------------|----------------------------|
| Protein complexes | 3825                             | 1364                                | 2461                                | 64.34%                     |
| BPs, 50           | 10119                            | 2530                                | 7589                                | 75.00%                     |
| BPs, 100          | 11757                            | 3706                                | 8051                                | 68.48%                     |
| BPs, 300          | 13350                            | 5780                                | 7570                                | 56.70%                     |
| BPs, 500          | 13573                            | 6689                                | 6884                                | 50.72%                     |
| Filtered BPs      | 4415                             | 575                                 | 3840                                | 86.98%                     |

**Table S 2. A substantial fraction of physical interactions are intermodular.** **Modules** gives the set of functional modules considered. These are: 1) protein complexes, 2) a subset of specific GO BP terms, each of which annotates at most 50, 100, 300, or 500 proteins in the yeast genome, or 3) a subset of filtered biological processes (as described in **Materials and Methods**). **Num Annotated Interactions** gives the number of interactions in the subnetwork generated from the *Direct* network where nodes represent proteins in the considered modules and edges represent interactions amongst them. **Num Intramodular Interactions** gives the number of interactions in the subnetwork where the two interacting proteins belong to the same module. **Num Intermodular Interactions** gives the number of interactions in the subnetwork where the two interacting proteins belong to different modules. **Intermodular Percentage** gives the percentage of intermodular interactions amongst the annotated interactions.
