# Supplementary material for: From Hub Proteins to Hub Modules: The Relationship Between Essentiality and Centrality in the Yeast Interactome at Different Scales of Organization
Source: PLOS journal article supplement (doi:10.1371/journal.pcbi.1002910), 2013-02-21
Supplement: S20 (10.1371/journal.pcbi.1002910.s020) [file journal.pcbi.1002910.s020]

(a) Protein complexes

| Network   | $\text{SRCC}_{\text{degree}}$ | $\text{SRCC}_{\text{degree/size}}$ | $\text{SRCC}_{\text{degree}\cdot\text{size}}$ |
|-----------|-------------------------------|------------------------------------|-----------------------------------------------|
| Direct    | 0.3358 (1e-11)                | 0.2735 (4e-08)                     | 0.2233 (9e-06)                                |
| Pull-down | 0.3917 (1e-15)                | 0.2923 (4e-09)                     | 0.2729 (5e-08)                                |
| Full      | 0.4081 (0e+00)                | 0.2824 (1e-08)                     | 0.2924 (4e-09)                                |

(b) Filtered biological processes

| Network   | $\text{SRCC}_{\text{degree}}$ | $\text{SRCC}_{\text{degree/size}}$ | $\text{SRCC}_{\text{degree}\cdot\text{size}}$ |
|-----------|-------------------------------|------------------------------------|-----------------------------------------------|
| Direct    | 0.3400 (5e-12)                | 0.2262 (6e-06)                     | 0.2326 (3e-06)                                |
| Pull-down | 0.3866 (2e-15)                | 0.2656 (1e-07)                     | 0.2838 (1e-08)                                |
| Full      | 0.3606 (2e-13)                | 0.1253 (1e-02)                     | 0.2533 (4e-07)                                |

**Table S 3. Correlation between cross-talk (CT) degree and binary module essentiality for (a) protein complexes and (b) filtered biological processes.**  $\text{SRCC}_{\text{degree}}$  gives the SRCC between cross-talk degree and essentiality.  $\text{SRCC}_{\text{degree/size}}$  gives the SRCC between the normalized cross-talk degree (i.e., cross-talk degree of the module divided by the module size) and essentiality.  $\text{SRCC}_{\text{degree}\cdot\text{size}}$  gives the partial SRCC between cross-talk degree and essentiality when controlling for the module size.  $P$ -values for the SRCCs are shown within parentheses. A module is considered essential if has at least one essential protein, and not essential otherwise.
