# Supplementary material for: From Hub Proteins to Hub Modules: The Relationship Between Essentiality and Centrality in the Yeast Interactome at Different Scales of Organization
Source: PLOS journal article supplement (doi:10.1371/journal.pcbi.1002910), 2013-02-21
Supplement: S21 (10.1371/journal.pcbi.1002910.s021) [file journal.pcbi.1002910.s021]

(a) Protein complexes

| Network   | $\text{SRCC}_{\text{degree}}$ | $\text{SRCC}_{\text{degree/size}}$ | $\text{SRCC}_{\text{degree-size}}$ |
|-----------|-------------------------------|------------------------------------|------------------------------------|
| Direct    | 0.2725 (5e-08)                | 0.2283 (5e-06)                     | 0.1859 (2e-04)                     |
| Pull-down | 0.3335 (1e-11)                | 0.2612 (2e-07)                     | 0.2471 (8e-07)                     |
| Full      | 0.3321 (2e-11)                | 0.2369 (2e-06)                     | 0.2446 (1e-06)                     |

(b) Filtered biological processes

| Network   | $\text{SRCC}_{\text{degree}}$ | $\text{SRCC}_{\text{degree/size}}$ | $\text{SRCC}_{\text{degree-size}}$ |
|-----------|-------------------------------|------------------------------------|------------------------------------|
| Direct    | 0.1777 (4e-04)                | 0.1780 (4e-04)                     | 0.1897 (2e-04)                     |
| Pull-down | 0.2366 (2e-06)                | 0.2500 (6e-07)                     | 0.2596 (2e-07)                     |
| Full      | 0.1751 (5e-04)                | 0.1486 (3e-03)                     | 0.1884 (2e-04)                     |

**Table S 4. Correlation between cross-talk (CT) degree and the fraction of essential proteins in the module for (a) protein complexes and (b) filtered biological processes.**

Module essentiality is defined as the fraction of essential proteins within a module.  $\text{SRCC}_{\text{degree}}$  gives the SRCC between the cross-talk degree of a module and its fraction of essential proteins.

$\text{SRCC}_{\text{degree/size}}$  gives the SRCC between the normalized cross-talk degree (i.e., the cross-talk degree of the module divided by the module size) and essentiality fraction.  $\text{SRCC}_{\text{degree-size}}$  gives the partial SRCC between cross-talk degree and essentiality fraction when controlling for the module size.  $P$ -values for the SRCCs are shown within parentheses.
