# Supplementary material for: From Hub Proteins to Hub Modules: The Relationship Between Essentiality and Centrality in the Yeast Interactome at Different Scales of Organization
Source: PLOS journal article supplement (doi:10.1371/journal.pcbi.1002910), 2013-02-21
Supplement: S22 (10.1371/journal.pcbi.1002910.s022) [file journal.pcbi.1002910.s022]

(a) Protein complexes

| Network   | SRCC <sub>degree</sub> | SRCC <sub>degree/size</sub> | SRCC <sub>degree·size</sub> |
|-----------|------------------------|-----------------------------|-----------------------------|
| Direct    | 0.3112 (3e-10)         | 0.2795 (2e-08)              | 0.1974 (9e-05)              |
| Pull-down | 0.2933 (4e-09)         | 0.2294 (5e-06)              | 0.1753 (5e-04)              |
| Full      | 0.3093 (4e-10)         | 0.2288 (5e-06)              | 0.1924 (1e-04)              |

(b) Filtered biological processes

| Network   | SRCC <sub>degree</sub> | SRCC <sub>degree/size</sub> | SRCC <sub>degree·size</sub> |
|-----------|------------------------|-----------------------------|-----------------------------|
| Direct    | 0.3325 (2e-11)         | 0.2186 (1e-05)              | 0.2220 (1e-05)              |
| Pull-down | 0.3786 (9e-15)         | 0.2608 (2e-07)              | 0.2734 (4e-08)              |
| Full      | 0.3475 (2e-12)         | 0.1068 (3e-02)              | 0.2384 (2e-06)              |

**Table S 5. Correlation between cross-talk (CT) degree and binary module essentiality after removing functionally similar cross-talks for (a) protein complexes and (b) filtered biological processes.** We removed cross-talks between modules that are annotated with a shared general biological process (see main body of the paper). In this restricted module-level network, **SRCC<sub>degree</sub>** gives the SRCC between the cross-talk degree and essentiality. **SRCC<sub>degree/size</sub>** gives the SRCC between the normalized cross-talk degree (i.e., cross-talk degree of the module divided by the module size) and essentiality. **SRCC<sub>degree·size</sub>** gives the partial SRCC between cross-talk degree and essentiality when controlling for the module size. *P*-values for the SRCCs are shown within parentheses. A module is considered essential if has at least one essential protein, and not essential otherwise.
