# Supplementary material for: From Hub Proteins to Hub Modules: The Relationship Between Essentiality and Centrality in the Yeast Interactome at Different Scales of Organization
Source: PLOS journal article supplement (doi:10.1371/journal.pcbi.1002910), 2013-02-21
Supplement: S23 (10.1371/journal.pcbi.1002910.s023) [file journal.pcbi.1002910.s023]

(a) Protein complexes

| Odd-score cutoff | # Cross-talks | SRCC (p-value) |
|------------------|---------------|----------------|
| 1.5              | 228           | 0.3430 (3e-12) |
| 2                | 194           | 0.3358 (1e-11) |
| 3                | 112           | 0.2841 (1e-08) |
| 4                | 60            | 0.1978 (8e-05) |
| 5                | 25            | 0.1046 (4e-02) |

(b) Filtered biological processes

| Odd-score cutoff | # Cross-talks | SRCC (p-value) |
|------------------|---------------|----------------|
| 1.5              | 1955          | 0.3452 (2e-12) |
| 2                | 1149          | 0.3400 (5e-12) |
| 3                | 199           | 0.2155 (2e-05) |
| 4                | 56            | 0.0885 (0.08*) |
| 5                | 12            | 0.0350 (0.5*)  |

**Table S 6. The significant correlation between cross-talk degree and binary module essentiality persists for a range of odd-scores in the *Direct* network for (a) protein complexes and (b) filtered biological processes. Odd-score cutoff** gives the minimum odd-score for a module pair to be considered a cross-talk. **# Cross-talks** gives the number of cross-talks at each cutoff. **SRCC (p-value)** gives the Spearman’s rho rank correlation coefficient between cross-talk degree and binary module essentiality. For larger odd-score cutoffs, there are fewer cross-talks and this results in somewhat lower SRCC values.
