# Supplementary material for: From Hub Proteins to Hub Modules: The Relationship Between Essentiality and Centrality in the Yeast Interactome at Different Scales of Organization
Source: PLOS journal article supplement (doi:10.1371/journal.pcbi.1002910), 2013-02-21
Supplement: S24 (10.1371/journal.pcbi.1002910.s024) [file journal.pcbi.1002910.s024]

(a) Protein complexes

| Odd-score cutoff | # Cross-talks | SRCC (p-value) |
|------------------|---------------|----------------|
| 1.5              | 641           | 0.3985 (2e-16) |
| 2                | 535           | 0.3917 (1e-15) |
| 3                | 311           | 0.3363 (9e-12) |
| 4                | 189           | 0.2845 (1e-08) |
| 5                | 125           | 0.2764 (3e-08) |

(b) Filtered biological processes

| Odd-score cutoff | # Cross-talks | SRCC (p-value) |
|------------------|---------------|----------------|
| 1.5              | 2400          | 0.3910 (1e-15) |
| 2                | 1409          | 0.3866 (2e-15) |
| 3                | 293           | 0.2705 (6e-08) |
| 4                | 62            | 0.1747 (5e-04) |
| 5                | 26            | 0.1437 (4e-03) |

**Table S 7. The significant correlation between cross-talk degree and binary module essentiality persists for a range of odd-scores in the *Pull-down* network for (a) protein complexes and (b) filtered biological processes. Odd-score cutoff** gives the minimum odd-score for a module pair to be considered a cross-talk. **# Cross-talks** gives the number of cross-talks at each cutoff. **SRCC (p-value)** gives the Spearman’s rho rank correlation coefficient between cross-talk degree and binary module essentiality. For larger odd-score cutoffs, there are fewer cross-talks and this results in somewhat lower SRCC values.
