# Supplementary material for: From Hub Proteins to Hub Modules: The Relationship Between Essentiality and Centrality in the Yeast Interactome at Different Scales of Organization
Source: PLOS journal article supplement (doi:10.1371/journal.pcbi.1002910), 2013-02-21
Supplement: S25 (10.1371/journal.pcbi.1002910.s025) [file journal.pcbi.1002910.s025]

(a) Protein complexes

| Odd-score cutoff | #Cross-talks | SRCC (p-value) |
|------------------|--------------|----------------|
| 1.5              | 910          | 0.4145 (0)     |
| 2                | 727          | 0.4081 (0)     |
| 3                | 428          | 0.3805 (7e-15) |
| 4                | 245          | 0.3139 (2e-10) |
| 5                | 154          | 0.2794 (2e-08) |

(b) Filtered biological processes

| Odd-score cutoff | #Cross-talks | SRCC (p-value) |
|------------------|--------------|----------------|
| 1.5              | 4545         | 0.3974 (3e-16) |
| 2                | 2306         | 0.3606 (2e-13) |
| 3                | 470          | 0.2753 (3e-08) |
| 4                | 116          | 0.1055 (4e-02) |
| 5                | 45           | 0.1074 (3e-02) |

**Table S 8. The significant correlation between cross-talk degree and binary module essentiality persists for a range of odd-scores in the *Full* network for (a) protein complexes and (b) filtered biological processes. Odd-score cutoff** gives the minimum odd-score for a module pair to be considered a cross-talk. **# Cross-talks** gives the number of cross-talks at each cutoff. **SRCC (p-value)** gives the Spearman’s rho rank correlation coefficient between cross-talk degree and binary module essentiality. For larger odd-score cutoffs, there are fewer cross-talks and this results in somewhat lower SRCC values.
