# Supplementary material for: From Hub Proteins to Hub Modules: The Relationship Between Essentiality and Centrality in the Yeast Interactome at Different Scales of Organization
Source: PLOS journal article supplement (doi:10.1371/journal.pcbi.1002910), 2013-02-21
Supplement: S29 (10.1371/journal.pcbi.1002910.s029) [file journal.pcbi.1002910.s029]

| Network          | Num Complexes Tested | Num Complexes with Higher Avg Essential Degree | Empirical p-value |
|------------------|----------------------|------------------------------------------------|-------------------|
| <i>Y2H-union</i> | 13                   | 11 (84.62%)                                    | 7e-3              |
| BinaryHQHT       | 14                   | 11 (78.57%)                                    | 2e-2              |

**Table S 12. Within each essential protein complex, essential proteins tend to have a higher average intracomplex degree.** **Num Complexes Tested** gives the number of complexes considered; each has at least two essential proteins and at least two non-essential proteins with intracomplex interactions. **Num Complexes with Higher Avg Essential Degree** gives the number of complexes among the tested complexes where essential proteins have a higher intracomplex degree on average than non-essential proteins. To compute the **Empirical p-value**, we did 10,000 random permutations of protein essentiality assignment, and for each permutation we computed the number of complexes with higher average degree for its essential proteins. The  $p$ -value is the fraction of random permutations where the number of such complexes is greater than or equal to the actual number, computed over the 10,000 random permutations.
