# Supplementary material for: From Hub Proteins to Hub Modules: The Relationship Between Essentiality and Centrality in the Yeast Interactome at Different Scales of Organization
Source: PLOS journal article supplement (doi:10.1371/journal.pcbi.1002910), 2013-02-21
Supplement: S30 (10.1371/journal.pcbi.1002910.s030) [file journal.pcbi.1002910.s030]

(a) Protein Complexes

| Network           | Num Cross-talks | Num Modules | Fraction of Essential Modules |
|-------------------|-----------------|-------------|-------------------------------|
| <i>Y2H-union</i>  | 2               | 4           | 0.75                          |
| <i>BinaryHQHT</i> | 46              | 54          | 0.81                          |

(b) Filtered Biological Processes

| Network           | Num Cross-talks | Num Modules | Fraction of Essential Modules |
|-------------------|-----------------|-------------|-------------------------------|
| <i>Y2H-union</i>  | 49              | 62          | 0.92                          |
| <i>BinaryHQHT</i> | 618             | 224         | 0.82                          |

**Table S 13. Module-level networks for (a) protein complexes and (b) filtered biological processes.** A module-level network was built for (a) protein complexes and (b) filtered biological processes using each of the networks. **Num Cross-talks** gives the number of inferred cross-talks. **Num Modules** gives the number of modules with at least one inferred cross-talk. **Fraction of Essential Modules** gives the fraction of modules having at least one essential protein, amongst modules with at least one cross-talk.
