# Supplementary material for: From Hub Proteins to Hub Modules: The Relationship Between Essentiality and Centrality in the Yeast Interactome at Different Scales of Organization
Source: PLOS journal article supplement (doi:10.1371/journal.pcbi.1002910), 2013-02-21
Supplement: S32 (10.1371/journal.pcbi.1002910.s032) [file journal.pcbi.1002910.s032]

|                              | Num Complexes<br>Tested | Num Complexes with Higher<br>Avg Essential Degree | Empirical<br>p-value |
|------------------------------|-------------------------|---------------------------------------------------|----------------------|
| <i>Pull-down<sup>f</sup></i> | 42                      | 28 (66.67%)                                       | 0e+00                |

**Table S 15. Within each essential protein complex, essential bait proteins tend to have a higher average intracomplex degree than non-essential bait proteins.** **Num Complexes Tested** gives the number of complexes considered in each of the two networks excluding small-scale experiments; each such complex was required to have at least two essential bait proteins and at least two non-essential bait proteins, each with intracomplex interactions. **Num Complexes with Higher Avg Essential Degree** gives the number of complexes among the tested complexes where the essential bait proteins have higher intracomplex degree on average than the non-essential bait proteins. To determine whether this number is significant, we randomly permuted essentiality assignments and computed the number of complexes with higher average intracomplex degrees for essential bait proteins. **Empirical  $p$ -value** gives the fraction of random permutations where the number of such complexes is greater than or equal to the actual number, computed over 10,000 permutations.
